# Supplementary material for: Removal of toluene from air- scream using semi industrial two-phase bioscrubber with cutting oil: An intervention study
Source: Research Square preprint supplement (doi:10.21203/rs.3.rs-1890340/v1), 2022-07-29
Supplement: Supplementary file 2 [file 3fb53c561412d70d8de9dca0.docx]

| **Table 1: Bioscrubber performance in removing toluene at different concentrations of cutting oil (5%, 7.5% and 10%)** | | | | | | | | | |
| --- | --- | --- | --- | --- | --- | --- | --- | --- | --- |
| Operational parameters | Different concentrations of organic phase | | | | | | | | |
| 5 % | | | 7.5 % | | | 10 % | | |
| Minimum | Maximum | Mean  (SD) | Minimum | Maximum | Mean  (SD) | Minimum | Maximum | Mean  (SD) |
| Inlet concentration  Mg/m3 | 178 | 1507 | 729  (400) | 130 | 1350 | 646  (407) | 331 | 776 | 562  (190) |
| Outlet concentration  Mg/m3 | 62 | 930 | 4440  (238) | 47 | 820 | 235  (105) | 138 | 540 | 253  (96) |
| Contaminant load  g/m3.h | 63 | 533 | 330  (180) | 6.2 | 103 | 45  (32) | 117 | 247 | 210  (85) |
| Removal efficiency (%) | 35 | 65 | 55  (8.8) | 38 | 63 | 53  (9.5) | 30 | 58 | 45.8  (7.3) |
| Elimination capacity  g/m3.h | 30 | 227 | 110  (62) | 17 | 291 | 129  (91) | 38.9 | 163 | 99  (40) |
| Percentage of carbon mineralization | 18 | 42 | 33  (6) | 12 | 53 | 38  (15) | 21 | 34 | 28  (5.8) |
| The amount of biomass  g/l | 0.8 | 23 | 13  (4) | 1 | 19 | 15  (5.4) | 1.5 | 32 | 19  (8) |
